# Supplementary material for: Pyrolysis-gas chromatography-mass spectrometry with electron-ionization and resonance-enhanced-multi-photon-ionization for the characterization of terrestrial dissolved organic matter in the Baltic Sea
Source: Royal Society of Chemistry journal article supplement (doi:10.1039/c5ay01292a), 2016-01-01
Supplement: c5ay01292a2.pdf [file c5ay01292a2.pdf]

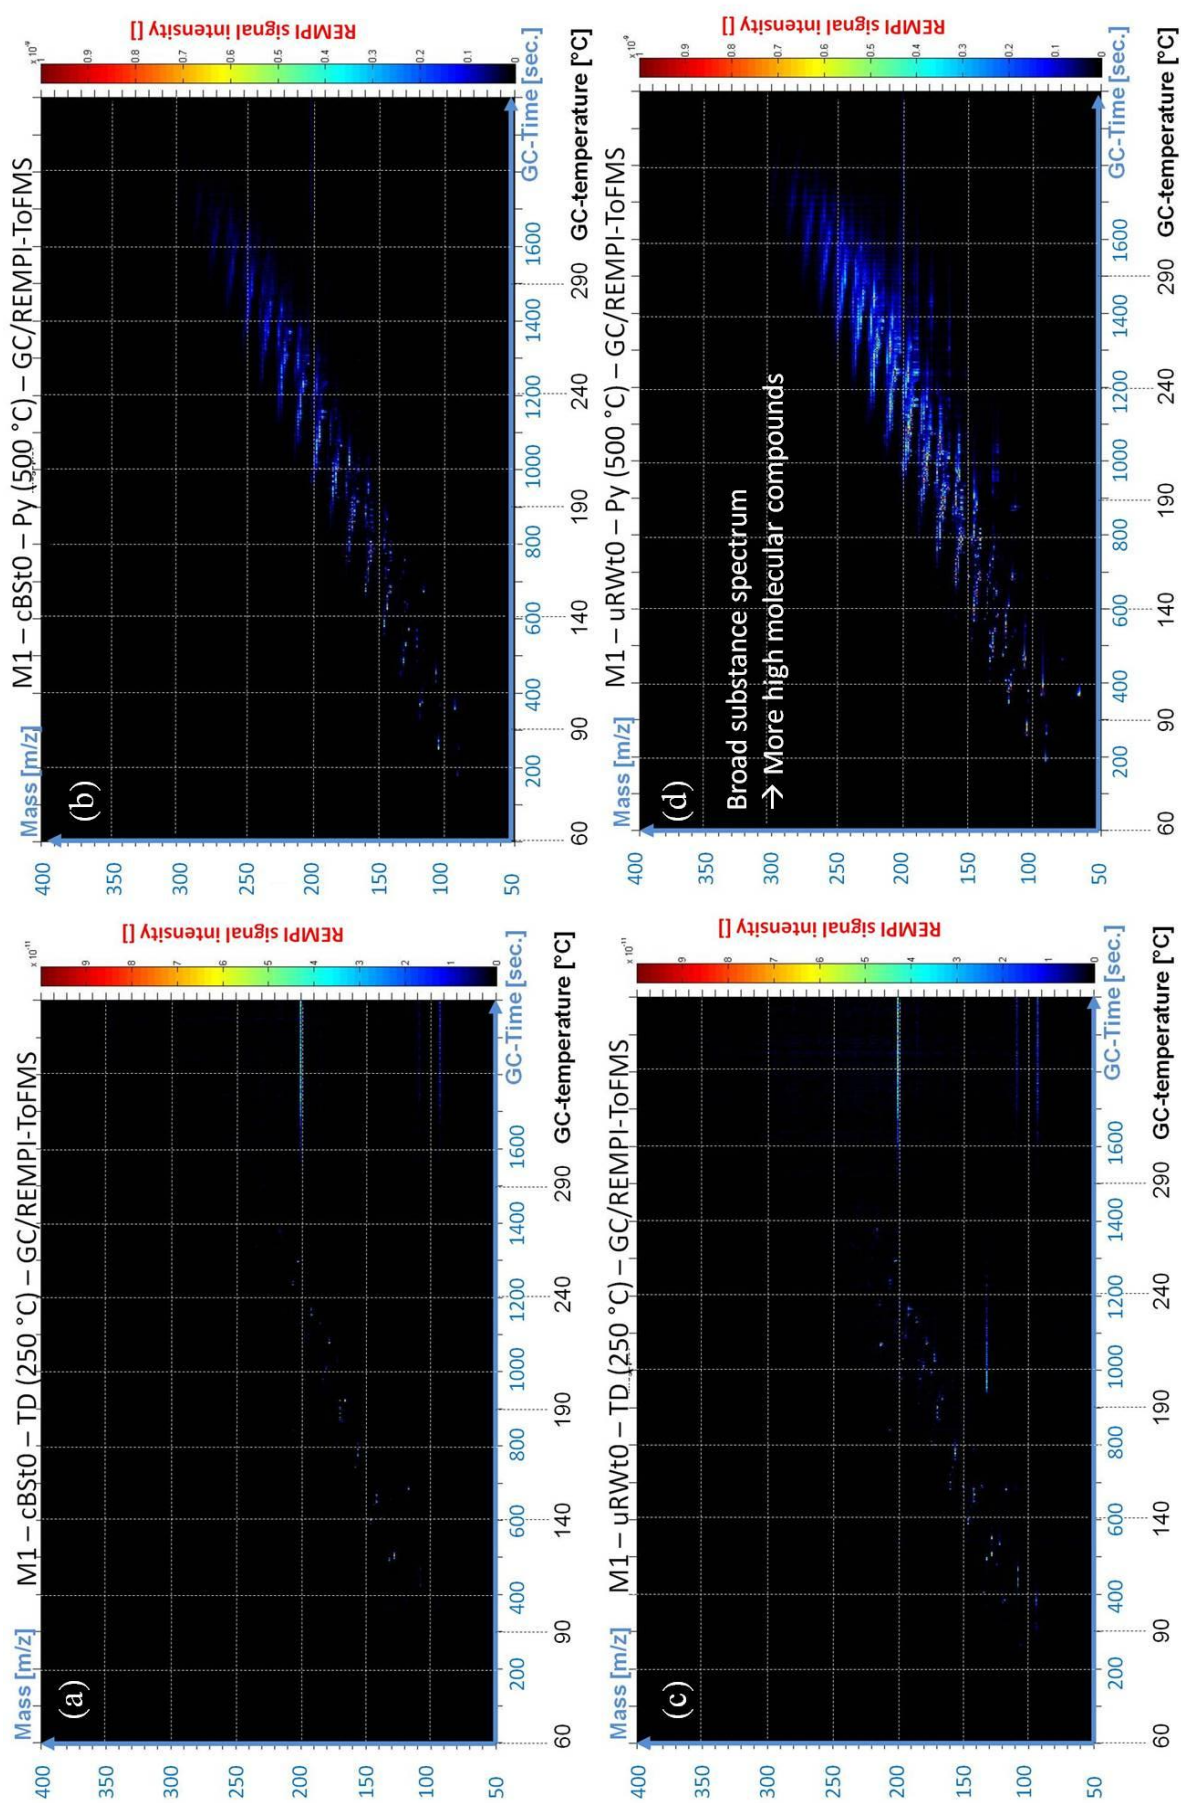

**Figure S2:** Composition between pure Baltic Sea water on the At1 station (cBS, a and b) and the mixing tank (uRW, c and d) at time zero. With the addition of river water the spectrum of substances increases, especially under pyrolysis conditions. An aromatic fingerprint is displayed.
